# Supplementary material for: Ice2 promotes ER membrane biogenesis in yeast by inhibiting the conserved lipin phosphatase complex
Source: PubMed Central journal article supplement (PMC8591542; doi:10.15252/embj.2021107958), 2021-10-06
Supplement: EMBJ-40-e107958-s015.pdf [file EMBJ-40-e107958-s015.pdf]

## Expanded View Figures

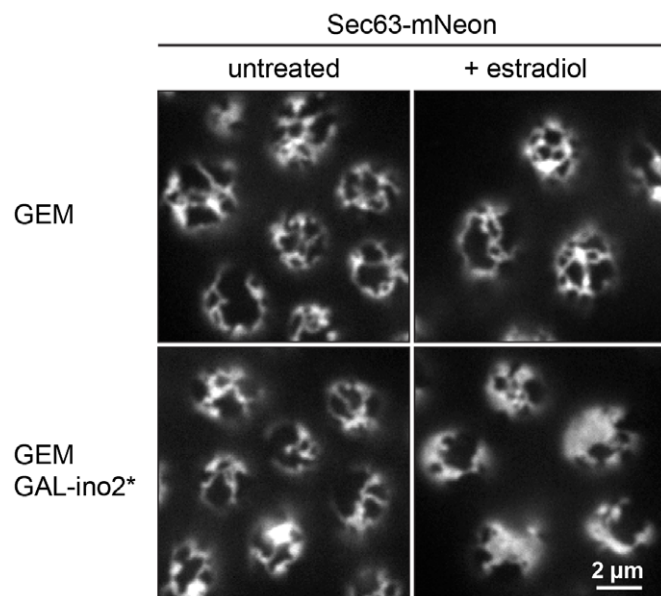**Figure EV1. An inducible system for ER membrane biogenesis.**

Sec63-mNeon images of cortical sections of cells containing the estradiol-inducible artificial transcription factor GEM (SSY2328) and cells additionally containing *ino2\** under the control of the *GAL* promoter (SSY1405). Cells were untreated or treated with 800 nM estradiol for 6 h.

Source data are available online for this figure.

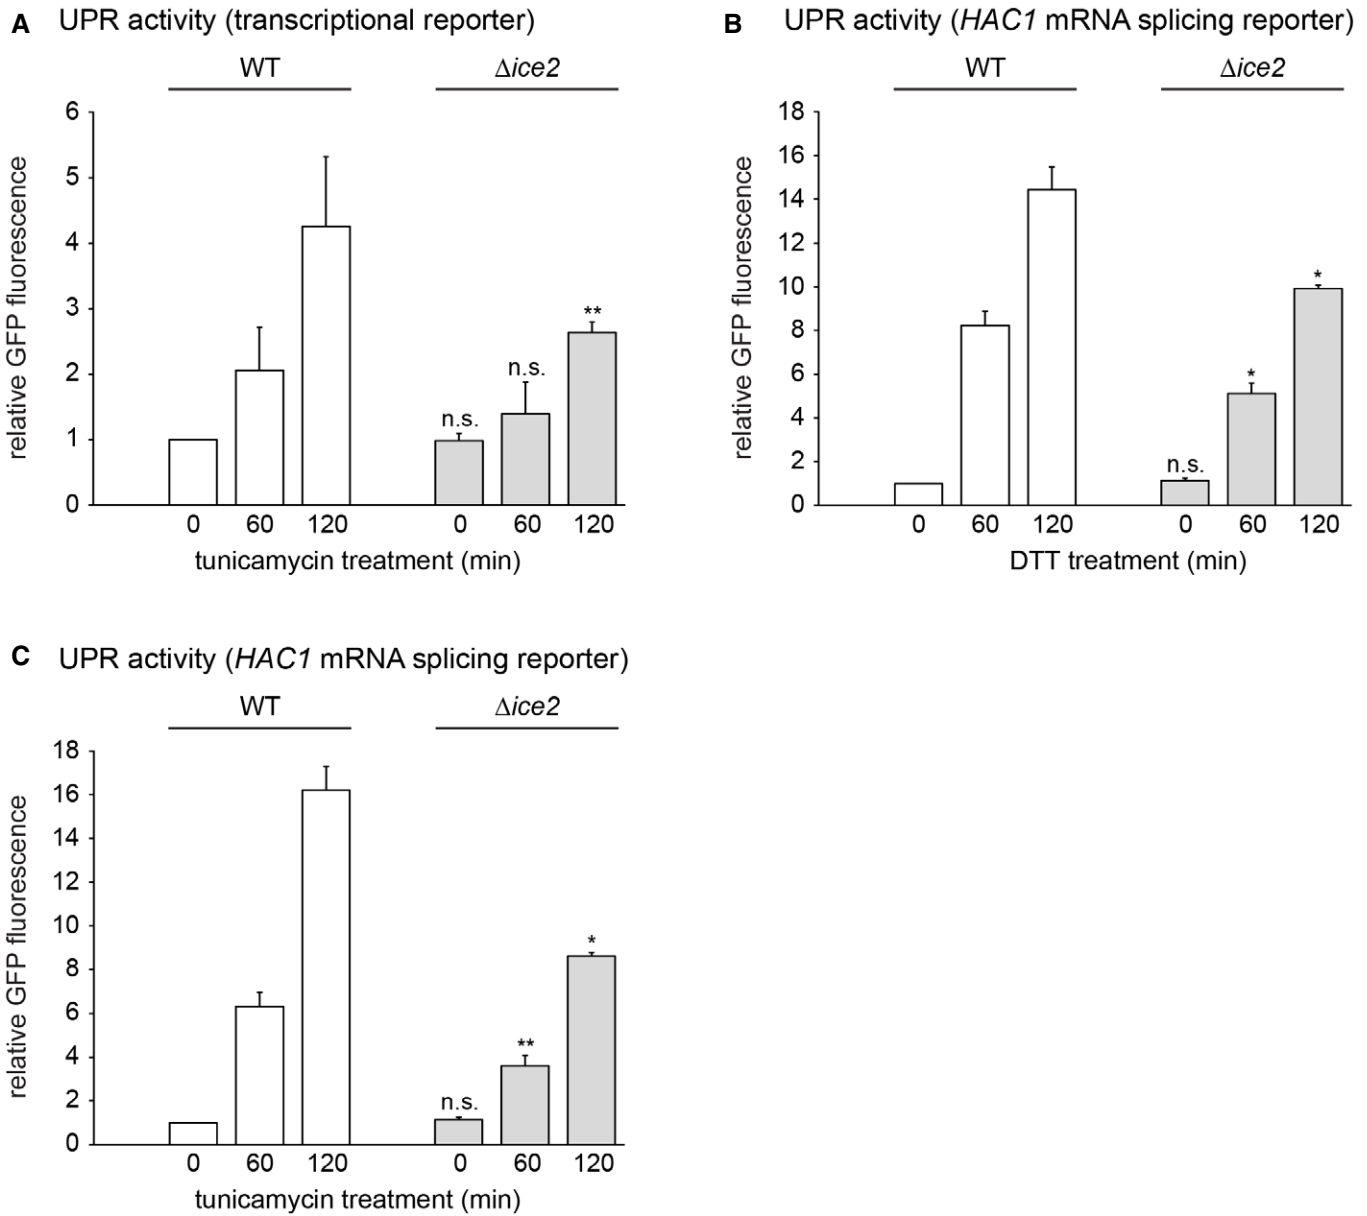

**Figure EV2. Deletion of *ICE2* impairs UPR signaling during ER stress.**

- A Flow cytometric measurements of GFP levels of WT and  $\Delta ice2$  cells containing the transcriptional UPR reporter (SSY2306, 2312). Cells were treated with 1  $\mu$ g/ml tunicamycin for the times indicated. Data were normalized to untreated WT cells. Mean + s.e.m.,  $n = 3$  biological replicates. Asterisks indicate statistical significance compared with the corresponding value in WT cells, as judged by a two-tailed Student's  $t$ -test assuming equal variance. An exception was the test against the normalized value for WT cells, for which a two-tailed Student's  $t$ -test with unequal variance was applied. \*\* $P < 0.01$ ; n.s., not significant.
- B, C Flow cytometric measurements of GFP levels of WT and  $\Delta ice2$  cells containing the *HAC1* mRNA splicing reporter (SSY2309, 2313). Cells were treated with 8 mM DTT (B) or 1  $\mu$ g/ml tunicamycin (C) for the times indicated. Data were normalized to untreated WT cells. Mean + s.e.m.,  $n = 3$  biological replicates. Asterisks indicate statistical significance compared with the corresponding value in WT cells, as judged by a two-tailed Student's  $t$ -test assuming equal variance. Exceptions were the tests against the normalized values for WT cells, for which a two-tailed Student's  $t$ -test with unequal variance was applied. \* $P < 0.05$ ; \*\* $P < 0.01$ ; n.s., not significant.

Source data are available online for this figure.

**Figure EV3. Absence of lipid droplets has no effect on ER expansion in WT or  $\Delta ice2$  cells.**

- A Growth assays of untreated WT,  $\Delta ice2$ ,  $\Delta LD$ , and  $\Delta LD \Delta ice2$  cells (SSY2228, 2229, 2230, 2256). Numbers represent areas under the curves and serve as growth indices. Mean + s.e.m.,  $n = 3$  biological replicates.  $\Delta LD$ ,  $\Delta lipid$  droplet.
- B, C Quantification of peripheral ER structures in WT,  $\Delta ice2$ ,  $\Delta LD$ , and  $\Delta LD \Delta ice2$  cells harboring the inducible system (SSY2598, 2599, 2600, 2601), which were untreated or treated with either 800 nM estradiol for 6 h (B) or 8 mM DTT for 1 h (C). Bars are the mean percentage of cell cortex covered by tubules (purple) or sheets (green),  $n = 3$  biological replicates. Upper error bars are s.e.m. for the sum of tubules and sheets, and lower error bars are s.e.m. for sheets. Asterisks indicate statistical significance, as judged by a two-tailed Student's  $t$ -test assuming equal variance. \* $P < 0.05$ ; \*\* $P < 0.01$ ; n.s., not significant.
- D Lipidomic analysis of WT,  $\Delta ice2$ ,  $\Delta nem1$ ,  $\Delta ice2 \Delta nem1$ ,  $\Delta spo7$ , and  $\Delta ice2 \Delta spo7$  cells (SSY1404, 2356, 2482, 2484, 2481, 2483). Mean + s.e.m.,  $n = 4$  biological replicates. Asterisks indicate statistical significance compared with WT cells, as judged by a two-tailed Student's  $t$ -test assuming equal variance. \* $P < 0.05$ ; \*\* $P < 0.01$ . The data are the same as in Fig 5C and D but are shown as lipid-to-protein ratios in  $\mu\text{g}$  measured lipid per g total protein.

Source data are available online for this figure.

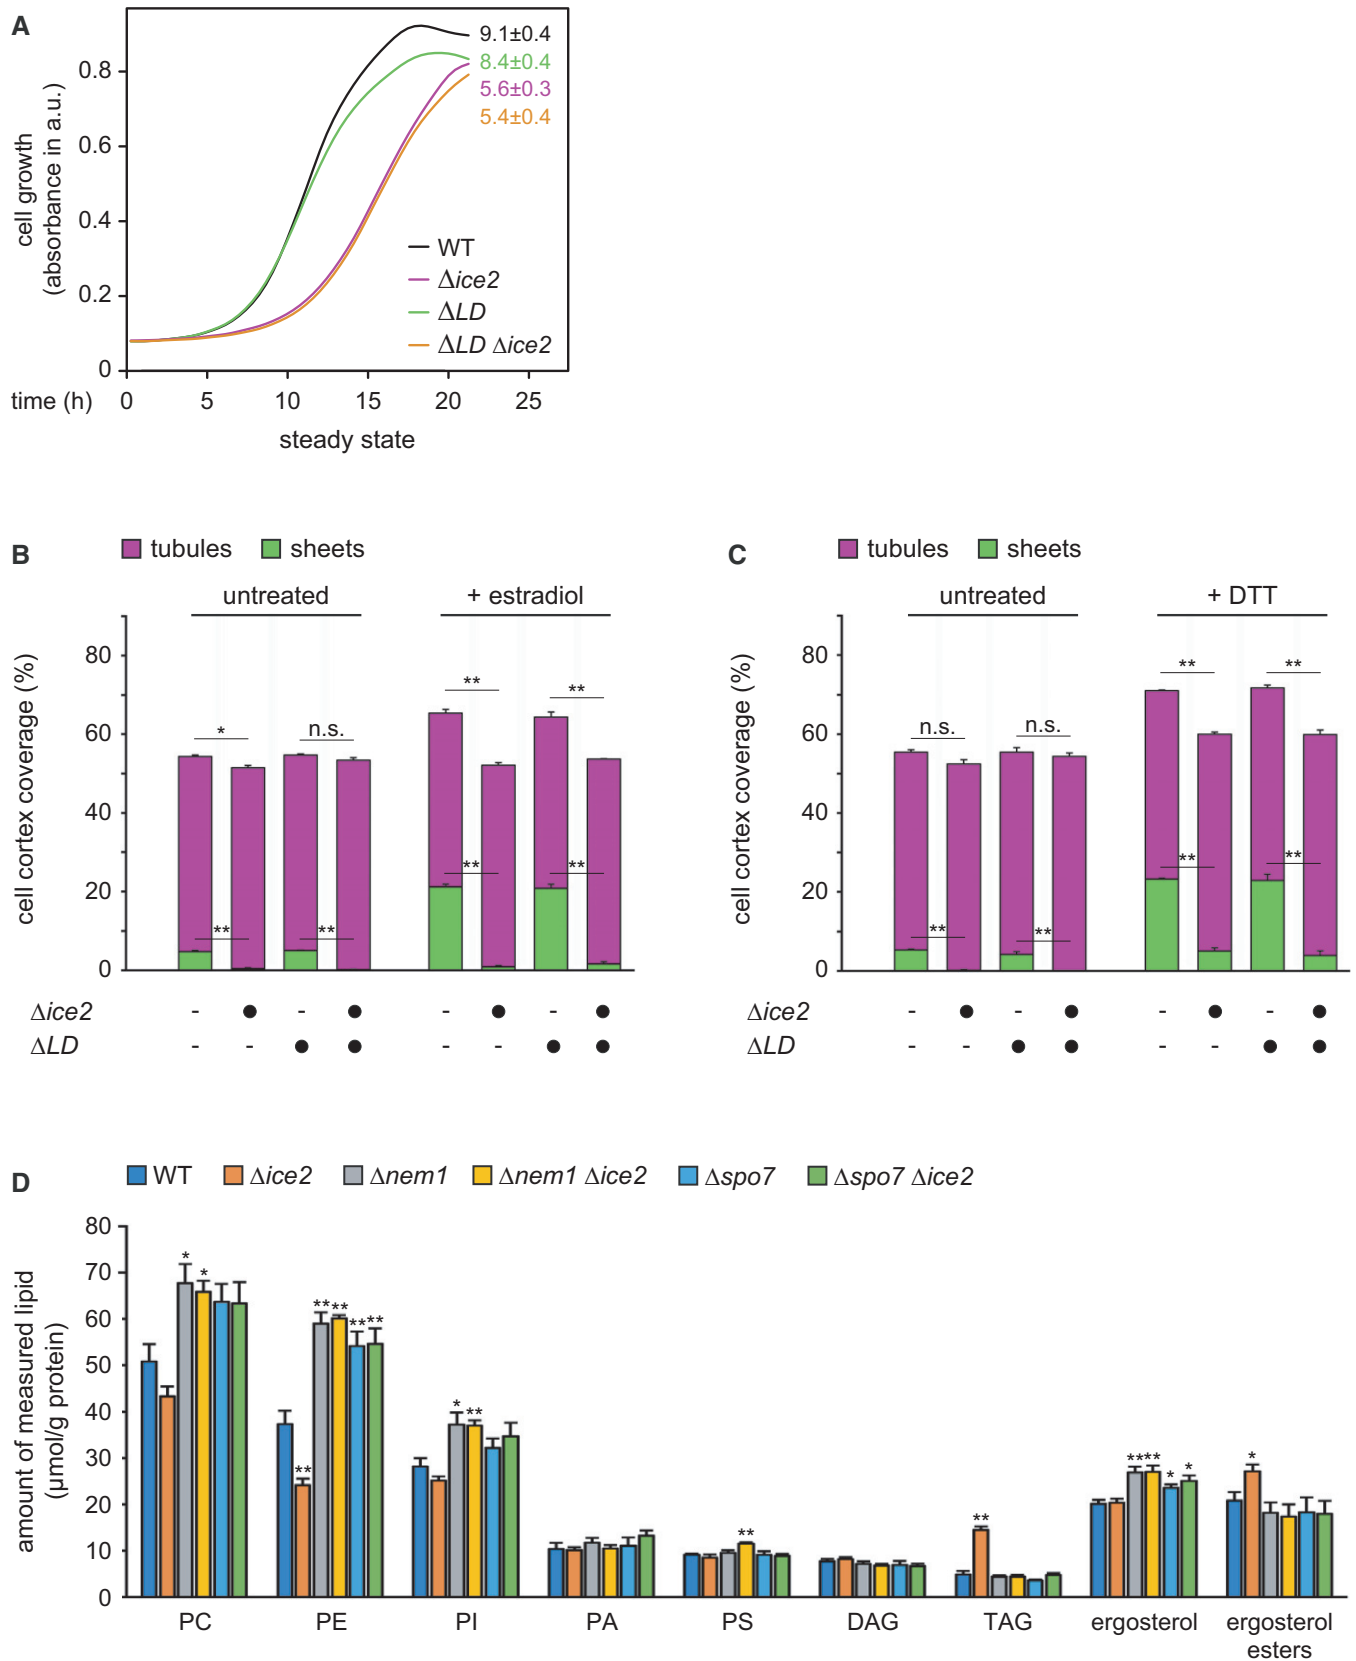

Figure EV3.

**Figure EV4. Abundance of Ice2, Spo7, and Nem1.**

- A Western blot of HA from total membranes prepared from WT,  $\Delta ice2$ , and *ICE2*-overexpressing and  $\Delta spo7$  cells containing Nem1-HA (SSY2913, 2914, 2915, 2945). An unspecific band served as a loading control.
- B Western blot of HA from total cell membranes from WT cells (SSY122) and cells expressing Ice2-HA, Spo7-HA, or Nem1-HA (SSY2421, 2910, 2913). Dpm1 served as a loading control.
- C Western blot of HA from total membranes prepared from WT cells (SSY122), WT,  $\Delta ice2$ , and *ICE2*-overexpressing cells containing Spo7-HA (SSY2910, 2911, 2912), and WT,  $\Delta ice2$ , and *ICE2*-overexpressing cells containing Nem1-HA (SSY2913, 2914, 2915). Sec61 served as a loading control. o/e, overexpression.
- D Images of cells expressing endogenously tagged Ice2-mScarlet and Sei1-mNeon (SSY3318) and stained with monodansylpentane to highlight lipid droplets. Arrows indicate foci containing Ice2.

Source data are available online for this figure.

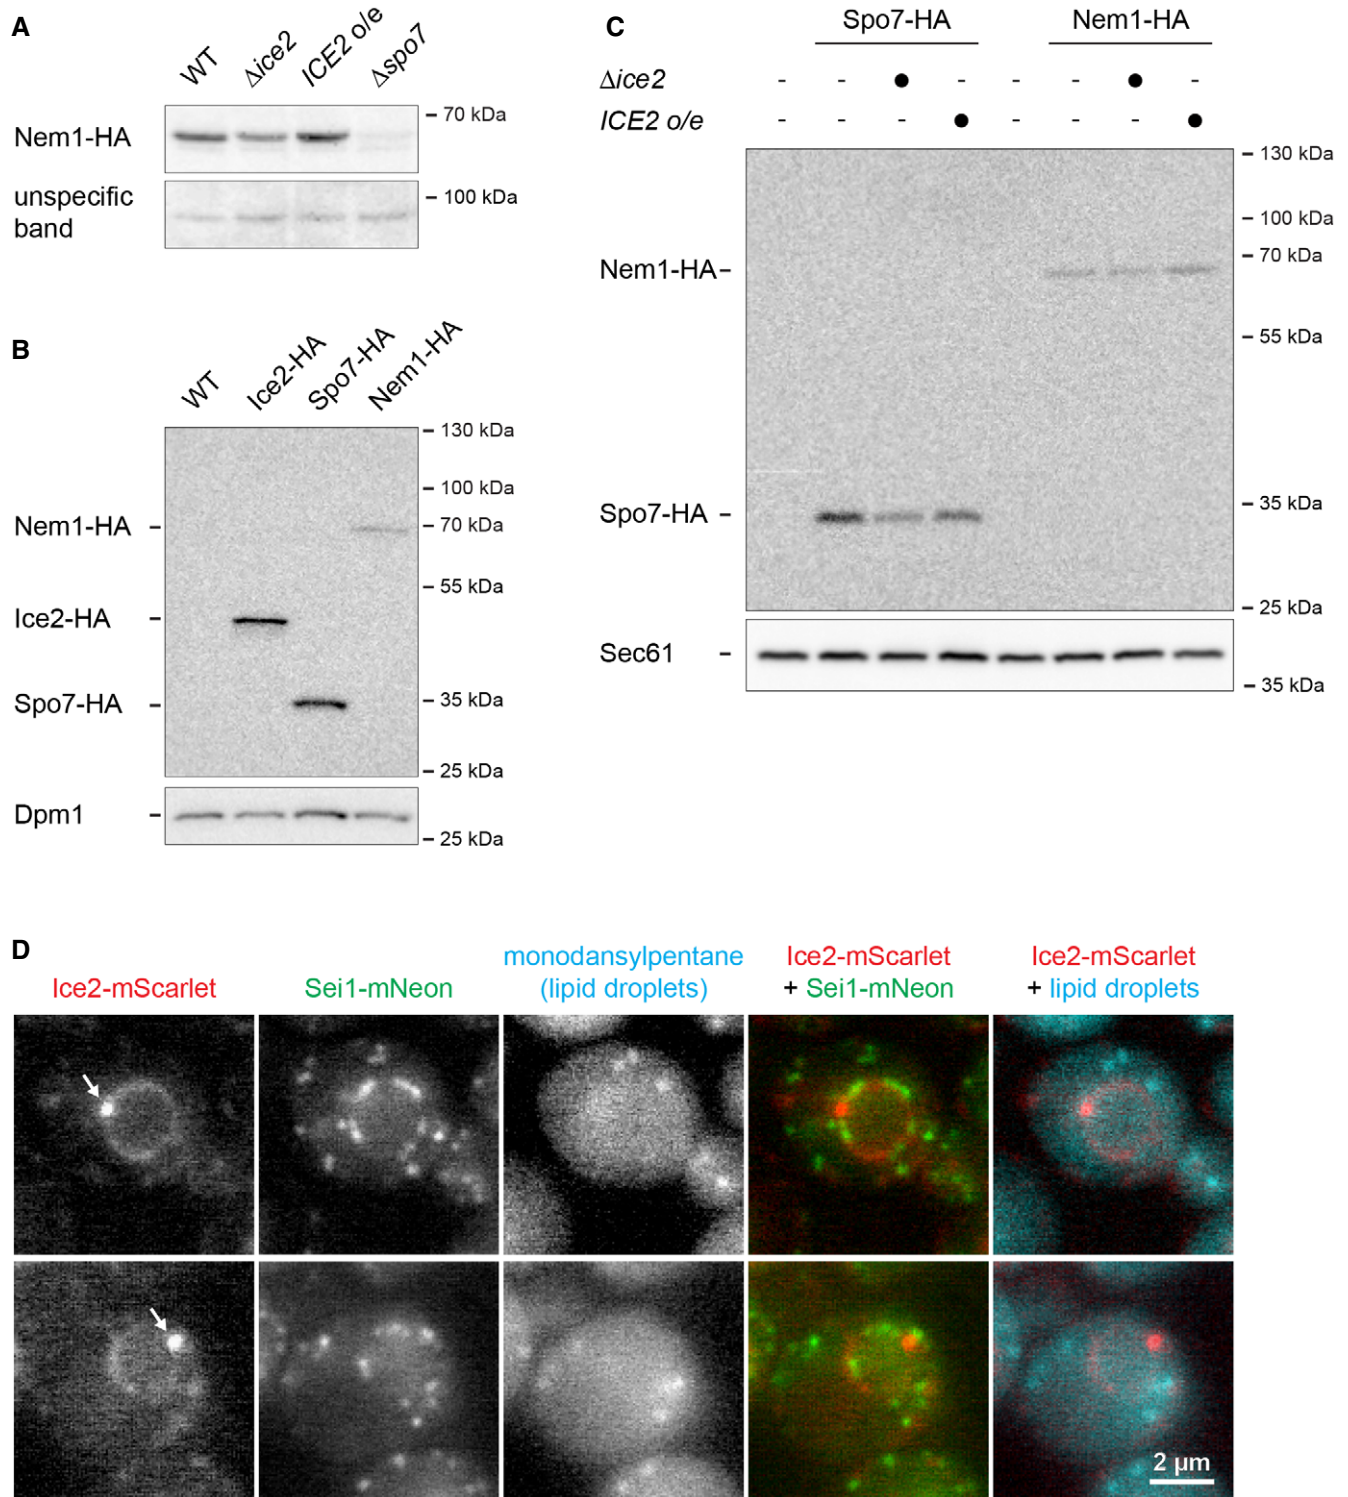

Figure EV4.

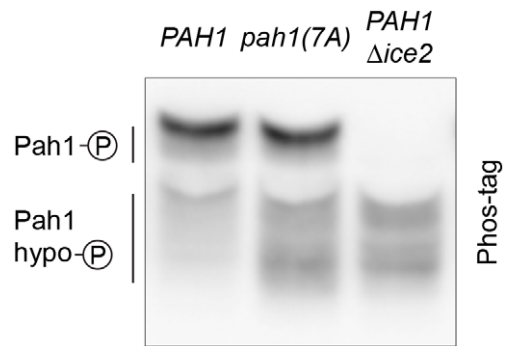

**Figure EV5. Phosphorylation status of pah1(7A).**

Western blot of HA from WT and  $\Delta ice2$  cells in which *PAH1* was replaced with *PAH1-HA* or *pah1(7A)-HA* as indicated (SSY2841, SSY2842, SSY2970).

Source data are available online for this figure.
